# Supplementary material for: Enhanced antibacterial activity of Cr doped ZnO nanorods synthesized using microwave processing
Source: Royal Society of Chemistry journal article supplement (doi:10.1039/c5ra13375k), 2015-01-01

## Reproducibility data for synthesis of Cr:ZnO

Normally, to check the constant yield of the synthesized product by microwave processing (Model LG-MC8088NRH), we repeat the synthesise.

When we synthesized Cr:ZnO nanopowders with the microwave technique, several experimental trails were made to achieve the constant yield. We confirmed the formation of Cr:ZnO for the samples with XRD analysis, assuring that the product show prominent Cr:ZnO peak without any impurity phase. With the optimized Cr:ZnO from XRD results, we also confirmed that the product yielded nano rod structure by taking SEM and EDX for two times. We were satisfied with the repeatability of the synthesized product, and then we proceeded with other characterization studies. I attach herewith the XRD and SEM characterization results repeated for Cr:ZnO

### Trial 1 XRD

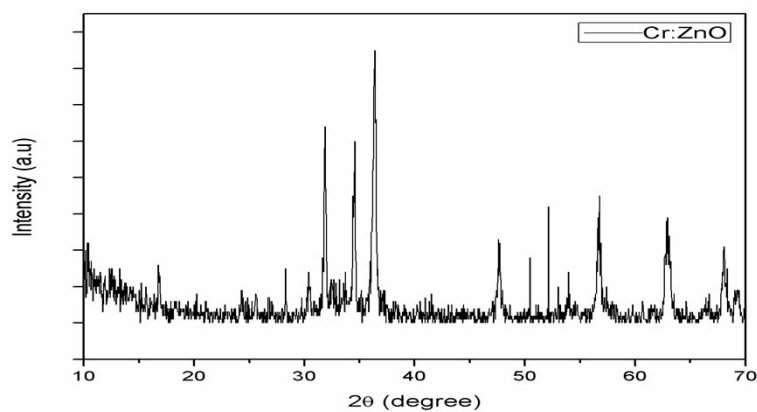

### Trial 2 XRD

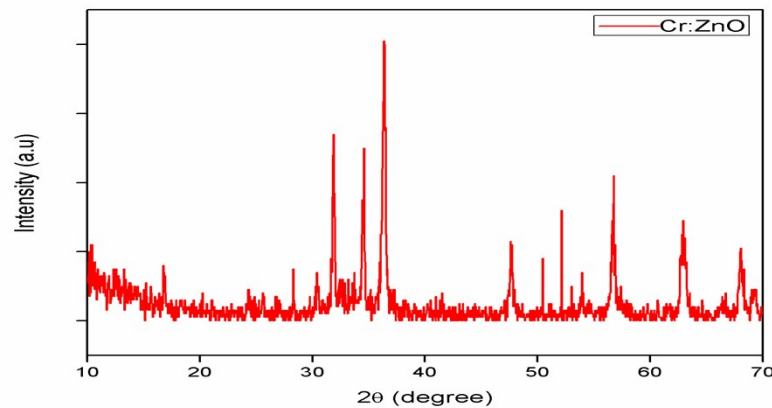

Final Trial : XRD reported in the work

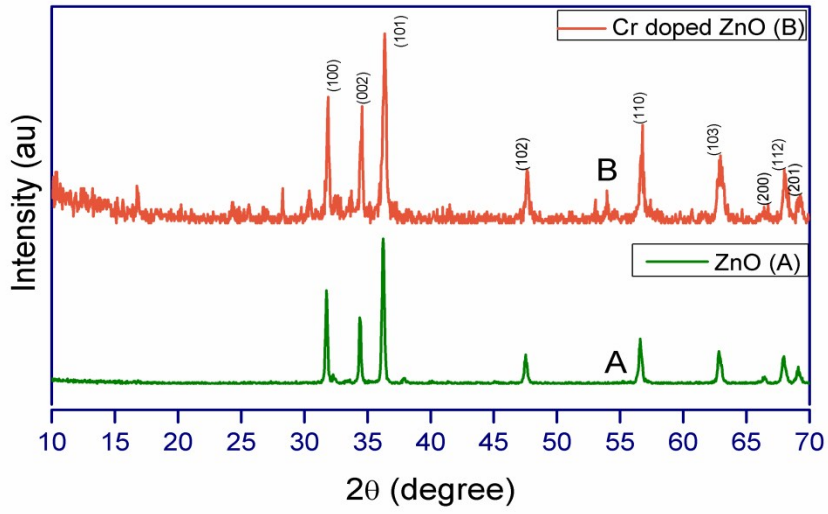

Trial 1

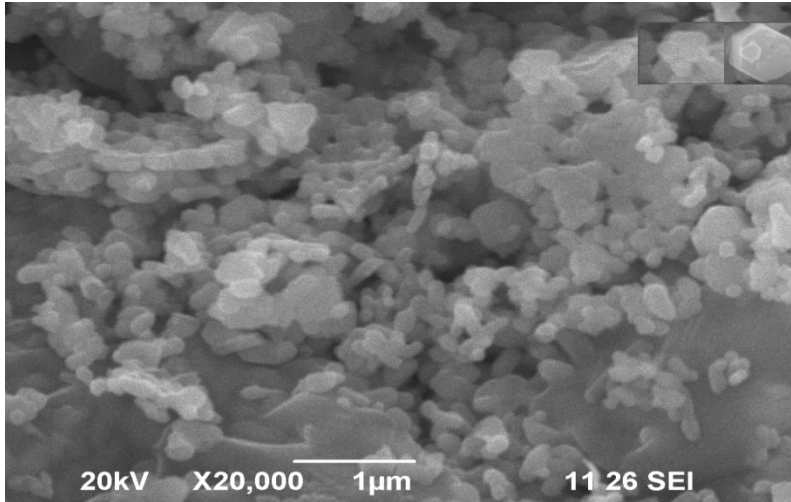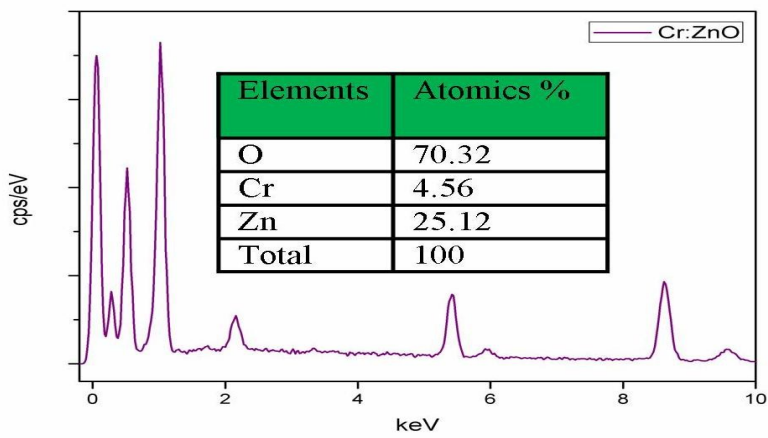

Final Trial : FESEM reported in the work

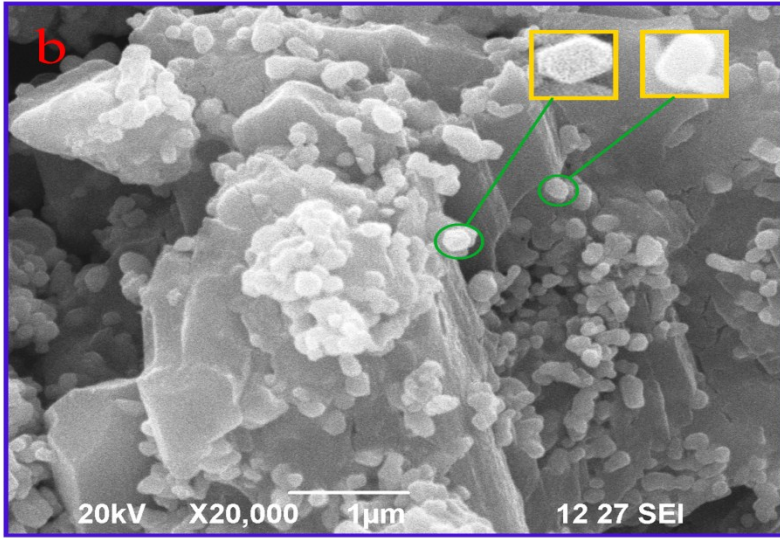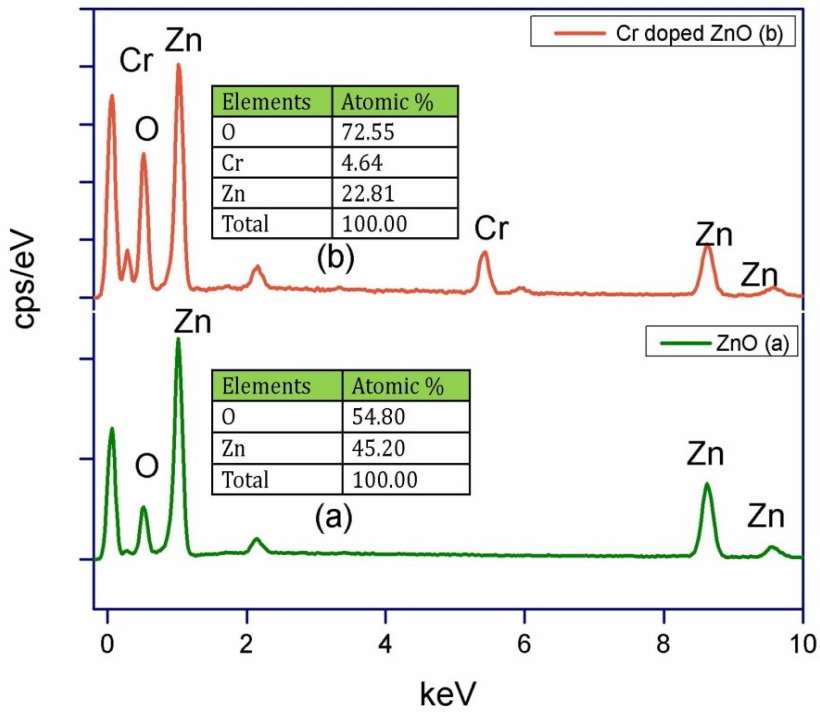

Supplement: c5ra13375k1.pdf [file c5ra13375k1.pdf]
